# Supplementary material for: Predictive Utility of Composite Child Feeding Indices (CCFIs) for Child Nutritional Status: Comparative Analyses for the Most Suitable Formula for Constructing an Optimum CCFI
Source: MDPI journal article supplement (doi:10.3390/ijerph19116621), 2022-05-29
Supplement: s1 [file s1]

## Supplementary Materials

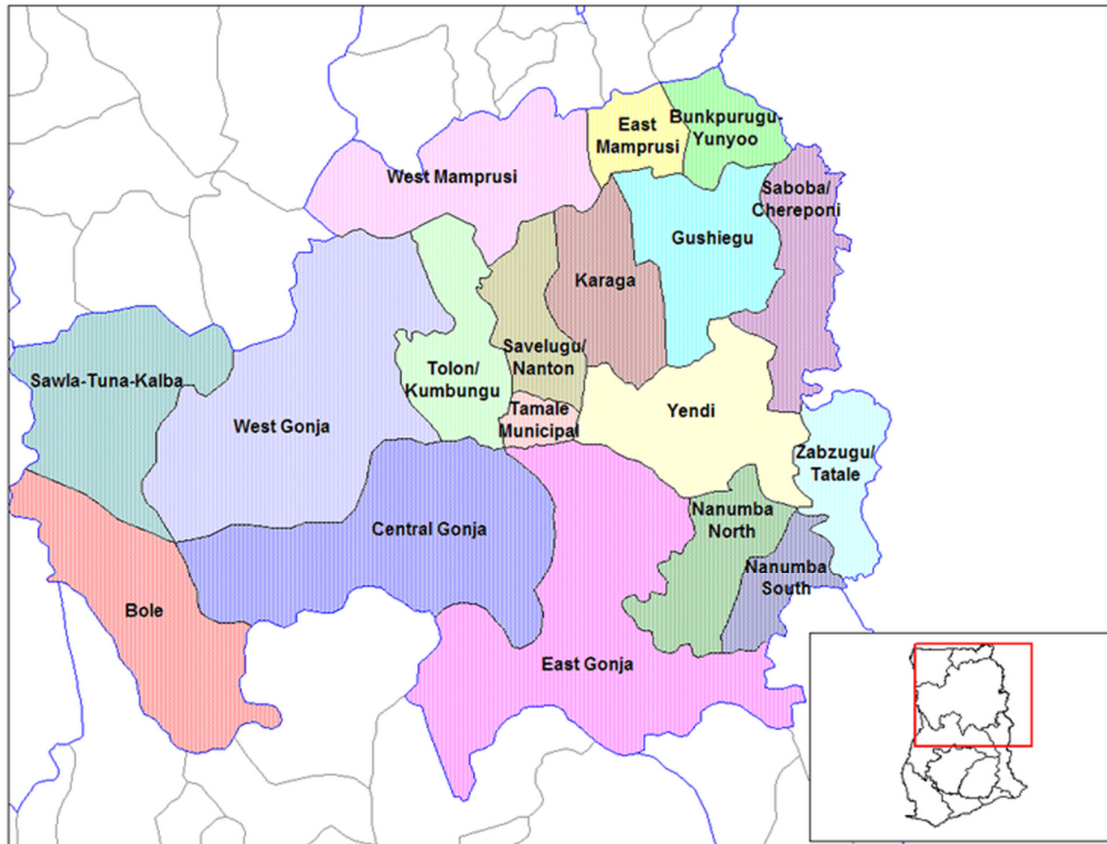

**Figure S1.** Illustrative Map of the Northern Region of Ghana ([www.ghanaweb.com](http://www.ghanaweb.com).)

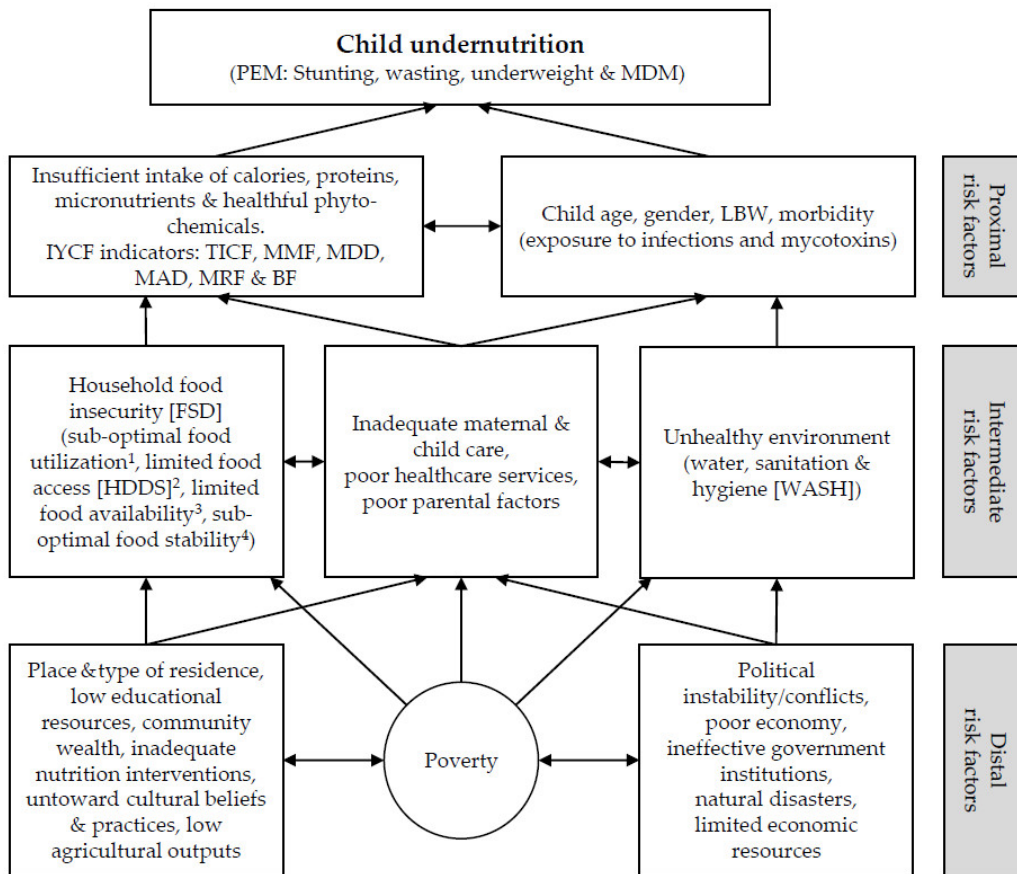

**Figure S2.** Conceptual Frame work for the Determinants of Malnutrition in Northern Ghana (Adopted and modified from Fanzo, 2012, Muller and Krawinkel, 2005 & UNICEF, 1998). <sup>1</sup> Sub-optimal food utilization: usage of nutritionally deleterious complementary food ingredient production practices such as Traditional Cereal Processing Methods (TCPMs), untoward Habitual Food Resource Utilization Practices (HFRUPs) such some traditional/indigenous food preparation methods, meal spoilage via lack of/poor storage facilities, post-harvest losses, poor knowledge of nutrition and untoward cultural beliefs and practices among other factors. <sup>2</sup> Limited food access (HDDS): low purchasing power, limited diversity of plant and animal food resources and inequitable household food /meal distribution <sup>3</sup> Limited food availability: inadequate food production, transportation and/or supply to the households' reach <sup>4</sup> Sub-optimal food stability: inconsistency in food production, supply, availability, access and utilization. FSD: Food Security Dimensions (Food Availability, Access, Utilization and Stability); HDDS: Household Dietary Diversity Score; IYCF: Infant and Young Child Feeding; LBW: Low Birth Weight; MAD: Minimum Acceptable Diet; MDD: Minimum Dietary Diversity; MDM: Micronutrient Deficiency Malnutrition; MMF: Minimum Meal Frequency; MRF: Micronutrient Rich Foods; BF: Breastfeeding; MRF: Micronutrient-Rich Foods; PEM: Protein Energy Malnutrition; TICF: Timely Introduction to Complementary Feeding.
